# Supplementary material
Source: Springer Nature journal article supplement (https://www.springermedizin.de/resource/supplementary/12885_2013_3875_MOESM1_ESM.pdf/9464650)
Supplement: MOESM1 [file 9464650]

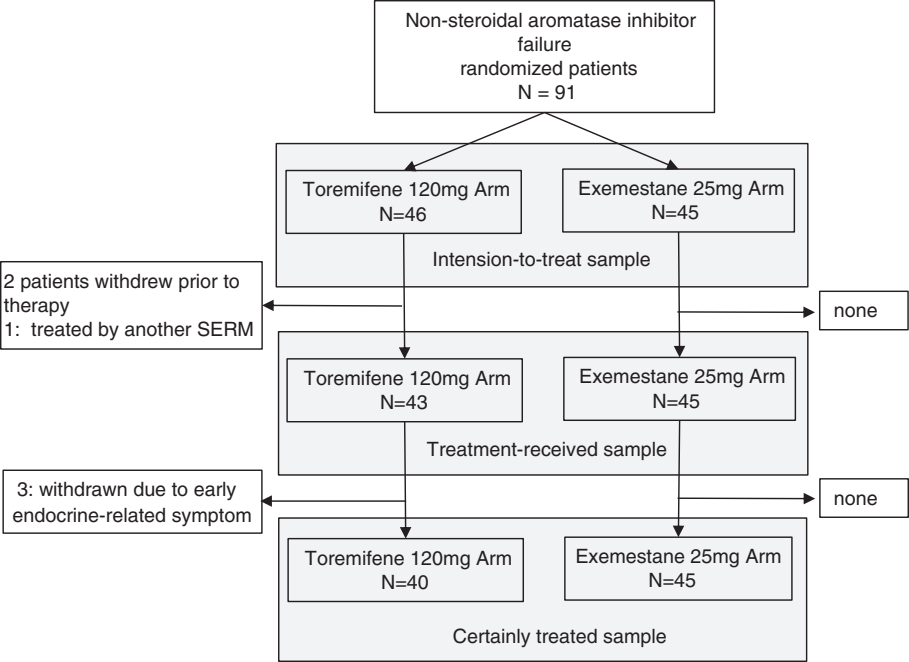

Non-steroidal aromatase inhibitor failure  
randomized patients  
N = 91

Toremifene 120mg Arm  
N=46

Exemestane 25mg Arm  
N=45

Intension-to-treat sample

2 patients withdrew prior to therapy  
1: treated by another SERM

none

Toremifene 120mg Arm  
N=43

Exemestane 25mg Arm  
N=45

Treatment-received sample

3: withdrawn due to early endocrine-related symptom

none

Toremifene 120mg Arm  
N=40

Exemestane 25mg Arm  
N=45

Certainly treated sample
